# Supplementary material
Source: PubMed Central journal article supplement (PMC2714974)
Supplement: NIHMS5232-supplement-suppl_1.pdf [file NIHMS5232-supplement-suppl_1.pdf]

SUPPLEMENTARY INFORMATION

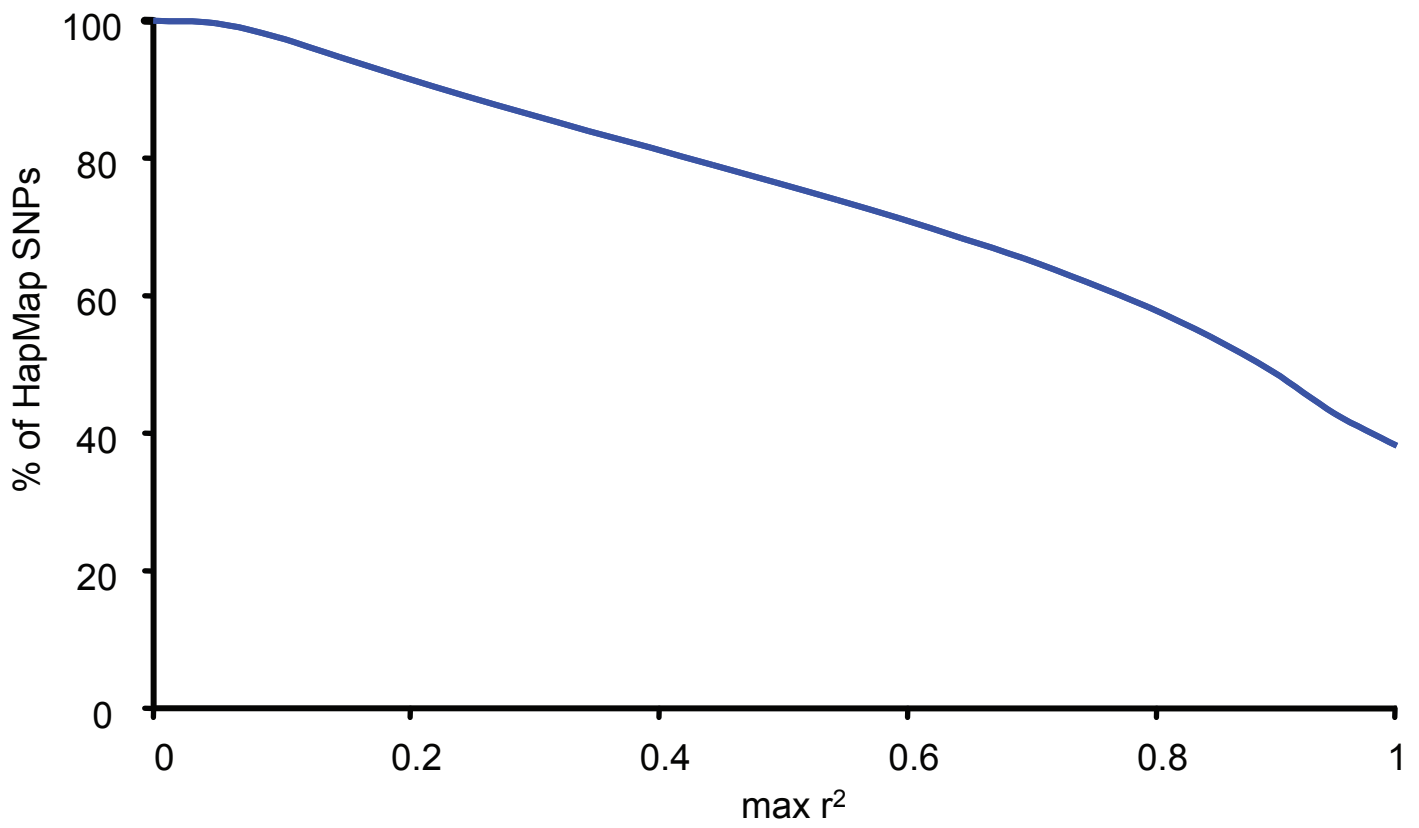

**SNPs analysed**

**Samples analysed**

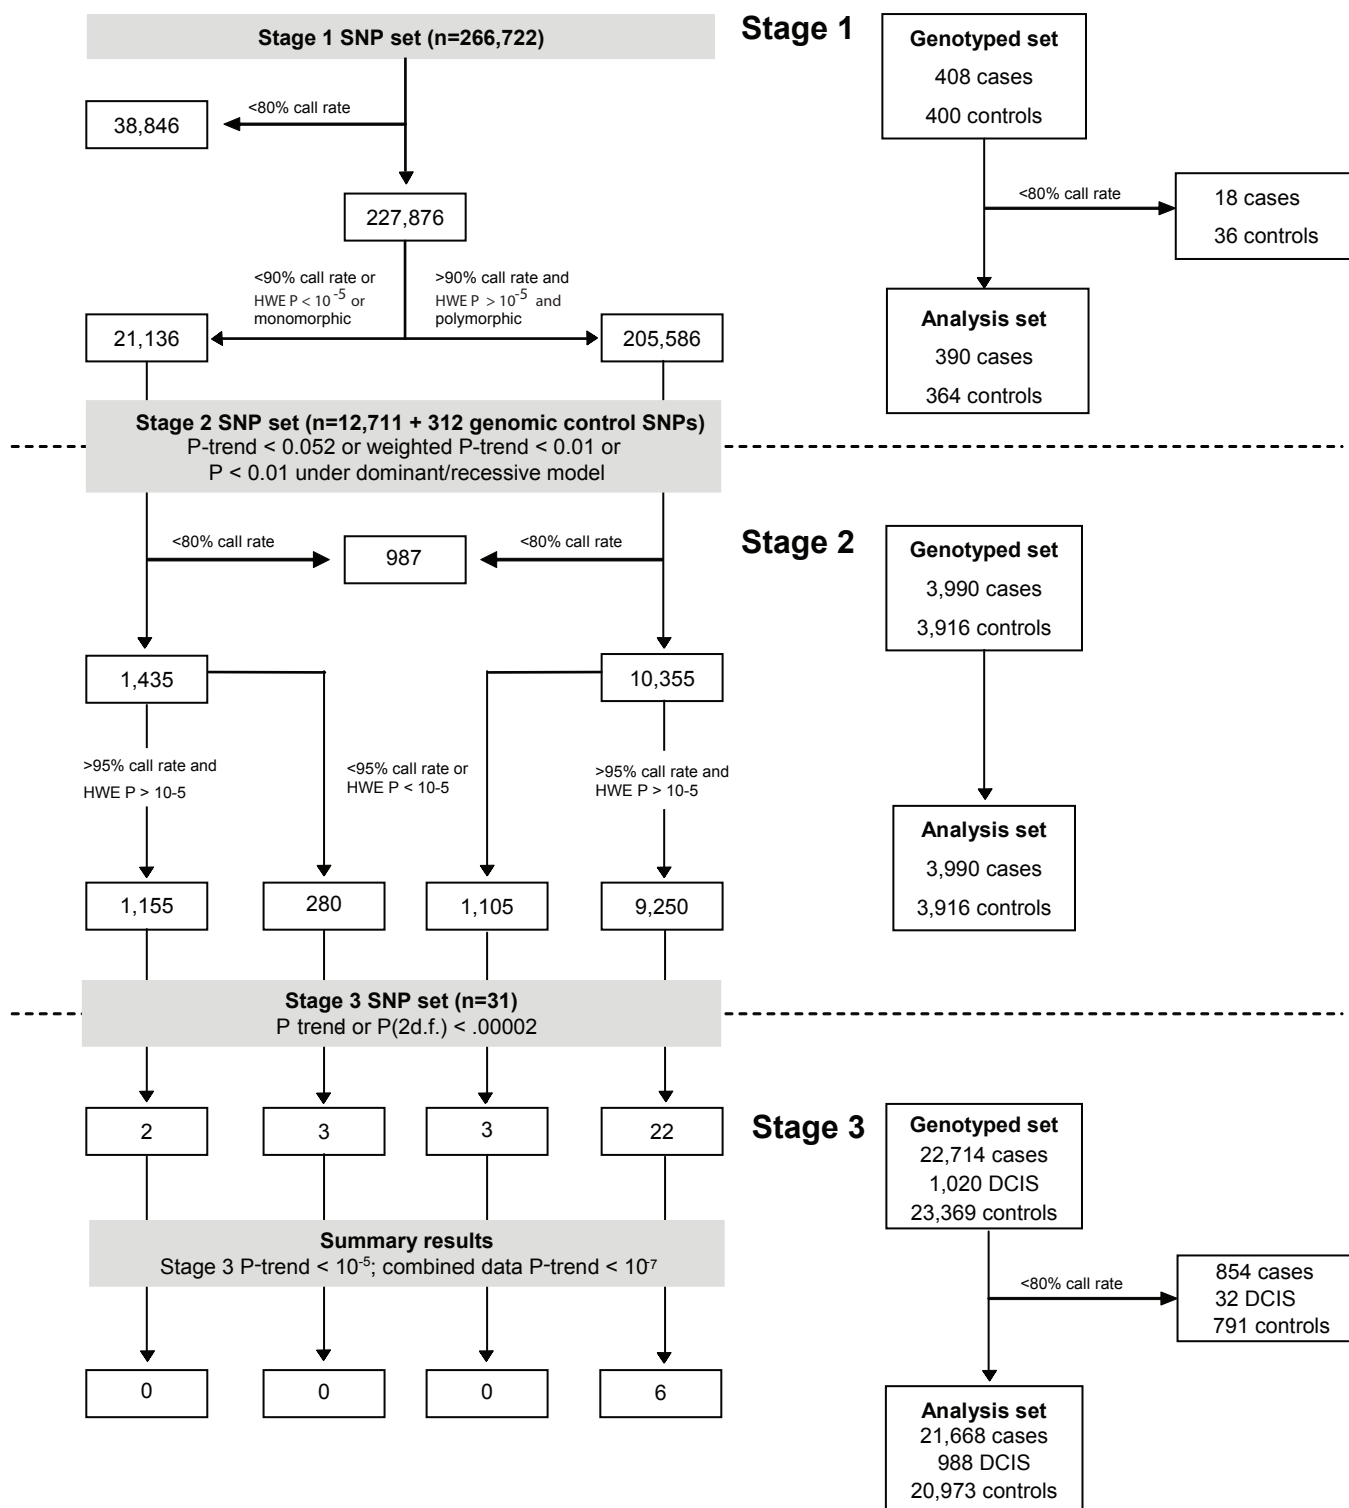

## Fine mapping of FGFR2 LD block

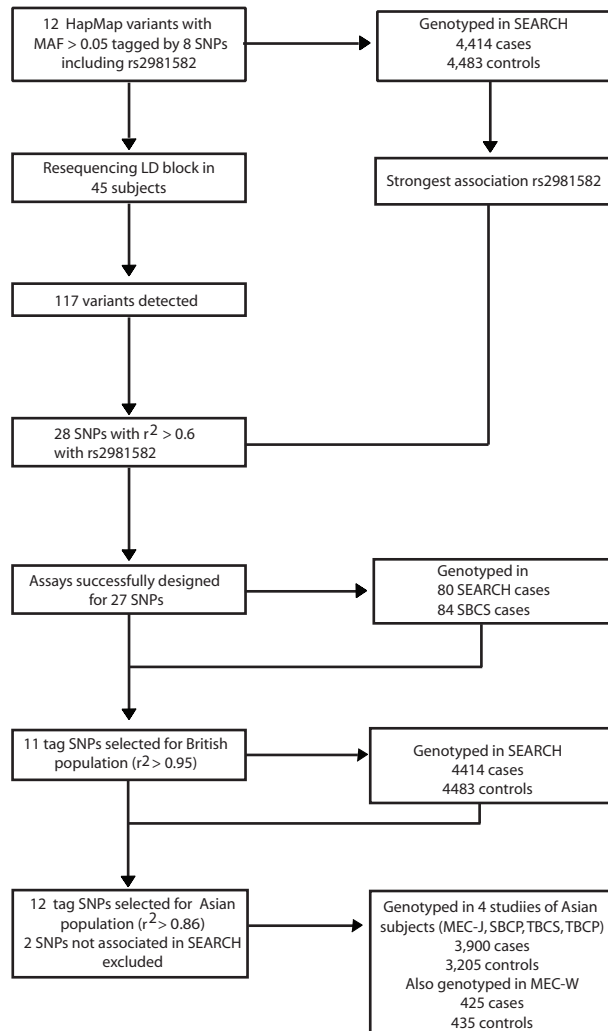

**Supplementary table 1.** Characteristics of markers showing a case-control difference significant at  $p < .01$  in stages 1 and 2 (Cochran-Armitage test).

|                           | Stage 1     |           | Stage 2    |           |
|---------------------------|-------------|-----------|------------|-----------|
|                           | $p < .01$   | $p > .01$ | $p < .01$  | $p > .01$ |
| Total                     | 2388 (1.2%) | 203198    | 171 (1.6%) | 10,234    |
| Call rate                 |             |           |            |           |
| 90-95%                    | 290 (1.6%)  | 18050     | -          | -         |
| 95-99%                    | 809 (1.1%)  | 69764     | 43 (1.5%)  | 2,747     |
| >99%                      | 1289 (1.1%) | 115384    | 128 (1.7%) | 7,487     |
| Call rate difference >2%  | 374 (1.4%)  | 26692     | 4 (2.9%)   | 132       |
| Hardy-Weinberg $p < .001$ | 17 (0.9%)   | 1847      | 4 (3.1%)   | 126       |

**Supplementary table 2.** Summary of the breast cancer case-control studies used in stages 2 and 3.

| Study                                                                                                                     | Abbreviation     | Ref  | General Setting                                                                                                                                                                        | Number of subjects |           |          |                     | Age range |          | Genotyping platform(s) |
|---------------------------------------------------------------------------------------------------------------------------|------------------|------|----------------------------------------------------------------------------------------------------------------------------------------------------------------------------------------|--------------------|-----------|----------|---------------------|-----------|----------|------------------------|
|                                                                                                                           |                  |      |                                                                                                                                                                                        | Invasive cases     | CIS cases | Controls | positive FH (cases) | Cases     | Controls |                        |
| Australian Breast Cancer Family Study                                                                                     | ABCFS            | 1,2  | Australia; population-based case-control-family study                                                                                                                                  | 1485               |           | 839      | 191                 | 20-68     | 23-69    | Sequenom iPLEX         |
| Breast Cancer Study in Taiwan <sup>2</sup>                                                                                | BCST             | 3,4  | Taiwan; hospital-based case-control study                                                                                                                                              | 1000               | 0         | 1000     | 21                  | 30-85     | 30-85    | Taqman                 |
| Copenhagen Breast Cancer Study and General Population Study                                                               | CGPS             | 5,6  | Denmark (Copenhagen); population-based                                                                                                                                                 | 1738               | 59        | 3045     | 383                 | 29-93     | 20-90    | Taqman                 |
| Gene Environment Interaction and Breast Cancer in Germany                                                                 | GENICA           | 7    | Germany; population-based case-control study                                                                                                                                           | 608                |           | 626      | 71                  | 23-80     | 24-80    | Sequenom iPLEX         |
| Hannover Breast Cancer Study                                                                                              | HBCS             | 8    | Germany; hospital-based                                                                                                                                                                | 1098               | 4         | 1017     | 162                 | 27-83     | 18-68    | Taqman                 |
| Helsinki Breast Cancer Project                                                                                            | HBCP             | 9-11 | Finland; hospital-based case-control study + additional familial cases                                                                                                                 | 2099               | 164       | 1065     | 805                 | 21-96     | 18-65    | Taqman                 |
| IARC – Thai Breast Cancer Study                                                                                           | TBCS             |      | Thailand, hospital based case-control study                                                                                                                                            | 474                |           | 390      | 16                  | 17 – 81   | 18 - 82  | Taqman                 |
| Kathleen Cuninghame Foundation Consortium for Familial Breast Cancer (kConFab) and Australian Ovarian Cancer Study (AOCS) | KConFab/<br>AOCS | 12   | Australia and New Zealand; clinic-based recruitment of familial breast cancer patients (cases)<br><br>Australia; population-based case-control study of ovarian cancer (controls only) | 387                |           | 770      | 82                  | 25-78     | 20-81    | Sequenom iPLEX         |
| Kuopio Breast Cancer Project                                                                                              | KBCP             | 13   | Finland; hospital-based prospective clinical cohort                                                                                                                                    | 490                | 22        | 527      | 52                  | 44-91     | 37-77    | Taqman                 |
| Leiden University Medical Centre Breast Cancer Study                                                                      | LUMCBCS          | 14   | Netherlands (Leiden and Rotterdam), hospital-based                                                                                                                                     | 1206               | 152       | 600      | 228                 | 21-87     | 18-94    | Taqman                 |
| Mayo Clinic Breast Cancer Study                                                                                           | MCBCS            | 15   | US; clinic-based case-control study                                                                                                                                                    | 796                |           | 842      | 234                 | 25-87     | 27-85    | Taqman                 |
| Melbourne Collaborative Cohort Study                                                                                      | MCCS             | 16   | Australia: population based prospective cohort study                                                                                                                                   | 519                | 1         | 578      | 84                  | 41-79     | 39-69    | Taqman                 |
| Multi-ethnic cohort (White)                                                                                               | MEC-W            | 17   | Case-control study nested in prospective cohort                                                                                                                                        | 425                |           | 435      | 69                  |           |          | Taqman                 |
| Multi-ethnic cohort (Japanese)                                                                                            | MEC-J            | 17   | Case-control study nested in prospective cohort                                                                                                                                        | 448                |           | 394      | 77                  |           |          | Taqman                 |
| Nurses Health Study                                                                                                       | NHS              | 18   | Case-control nested in prospective cohort                                                                                                                                              | 1029               | 210       | 1761     | 209                 | 43-69     | 43-69    | Taqman                 |

| Study                                              | Abbreviation | Ref   | General Setting                                                                                            | Number of subjects |           |          |                     | Age range                         |                    | Genotyping platform(s) |
|----------------------------------------------------|--------------|-------|------------------------------------------------------------------------------------------------------------|--------------------|-----------|----------|---------------------|-----------------------------------|--------------------|------------------------|
|                                                    |              |       |                                                                                                            | Invasive cases     | CIS cases | Controls | positive FH (cases) | Cases                             | Controls           |                        |
| Polish Breast Cancer Study                         | PBCS         | 19    | Poland, Warsaw and Łódź; population-based case-control study                                               | 1987               | 136       | 2374     | 212                 | 20-74                             | 20-74              | Taqman                 |
| Rotterdam Breast Cancer Study                      | RBCS         | 20    | Hospital based case-control study                                                                          | 799                |           | 800      | 799                 | 18-84                             | 20+                | Taqman                 |
| Singapore and Sweden Breast Cancer Study           | SASBAC       | 21    | Sweden, population-based case-control study                                                                | 1314               |           | 1515     | 205                 | 50-74                             | 50-74              | Sequenom iPLEX, Taqman |
| SEARCH – stage 2 <sup>1</sup>                      | SEARCH2      | 22    | England; population-based case-control study                                                               | 3814               | 169       | 3890     | 347                 | 25-69                             | 42-80              | Taqman                 |
| SEARCH – stage 3 <sup>1</sup>                      | SEARCH3      | 22    | England; population-based case-control study                                                               | 612                | 20        | 554      | 50                  |                                   |                    |                        |
| Seoul Breast Cancer Project                        | SBCP         | 23    | Korea (Seoul); hospital-based case-control study                                                           | 2442               |           | 1780     | =                   | ≥ 40                              | ≥ 40               | Taqman                 |
| Sheffield Breast Cancer Study                      | SBCS         | 24,25 | England; hospital-based case-control study                                                                 | 1115               | 92        | 1265     | 165                 | 28-92                             | 45-80              | Taqman                 |
| Spanish National Cancer Centre Breast Cancer Study | CNIOBCS      | 26    | Spain; hospital-based case-control study                                                                   | 732                | 33        | 829      | 224                 | 22-86                             | 23-86              | Taqman                 |
| U.S. Radiologic Technologist Study                 | USRT         | 27,28 | US (national); nested case-control study within a cohort of approximately 140,000 radiologic technologists | 733                | 126       | 1059     | 173                 | 19-84 at dx<br>41-99 at interview | 41-91 at interview | Taqman                 |

<sup>1</sup> SEARCH study contributed all the samples to stage 2 plus additional samples to stage 3 (see methods)

<sup>2</sup> BCST was only used in the fine-scale mapping of the FGFR2 locus.

Supplementary table 3. Summary odds ratios for the 31 SNPs tested in stage 3

| LocalID  | rs number | Alleles <sup>1</sup> | Maf <sup>2</sup><br>SEARCH<br>(Asian) | Per allele OR       | HetOR<br>(95%CI)    | HomOR<br>(95%CI)    | p-trend             |                     |                     | p-het               |                     |                     | Hom <sup>3</sup> |
|----------|-----------|----------------------|---------------------------------------|---------------------|---------------------|---------------------|---------------------|---------------------|---------------------|---------------------|---------------------|---------------------|------------------|
|          |           |                      |                                       |                     |                     |                     | Stages1<br>&2       | Stage3              | Combined            | Stages1<br>&2       | Stage3              | Combined            |                  |
| BCAC3_01 | 2981582   | G/A                  | 0.38 (0.30)                           | 1.26<br>(1.23-1.30) | 1.23<br>(1.18-1.28) | 1.63<br>(1.53-1.72) | 4x10 <sup>-16</sup> | 4x10 <sup>-62</sup> | 2x10 <sup>-76</sup> | 3x10 <sup>-15</sup> | 10 <sup>-61</sup>   | 5x10 <sup>-76</sup> | .45              |
| BCAC3_02 | 12443621  | A/G                  | 0.46 (0.60)                           | 1.11<br>(1.08-1.14) | 1.14<br>(1.09-1.20) | 1.23<br>(1.17-1.30) | 10 <sup>-7</sup>    | 9x10 <sup>-14</sup> | 2x10 <sup>-19</sup> | 3x10 <sup>-7</sup>  | 3x10 <sup>-13</sup> | 3x10 <sup>-19</sup> | .18              |
| BCAC3_03 | 3857481   | G/A                  | 0.30 (0.29)                           | 1.00<br>(0.98-1.04) | 1.01<br>(0.96-1.05) | 1.01<br>(0.94-1.08) | 5x10 <sup>-7</sup>  | .75                 | .009                | 2x10 <sup>-6</sup>  | .95                 | .03                 | .01              |
| BCAC3_04 | 1318703   | T/C                  | 0.42 (0.50)                           | 1.03<br>(1.00-1.06) | 1.03<br>(0.99-1.08) | 1.06<br>(0.99-1.13) | .00003              | .08                 | .64                 | .0002               | .20                 | .90                 | .36              |
| BCAC3_05 | 16998733  | C/T                  | 0.12 (0.14)                           | 1.03<br>(0.98-1.08) | 1.03<br>(0.97-1.08) | 1.04<br>(0.86-1.25) | .00002              | .30                 | .26                 | 0.0001              | .57                 | 0.53                | .45              |
| BCAC3_09 | 2314099   | G/T                  | 0.06 (0.03)                           | 0.98<br>(0.92-1.05) | 0.97<br>(0.91-1.04) | 1.16<br>(0.83-1.64) | .53                 | .57                 | .43                 | 0.39                | .44                 | 0.21                | .53              |
| BCAC3_10 | 4841365   | C/G                  | 0.30 (0.77)                           | 1.00<br>(0.97-1.03) | 0.96<br>(0.89-1.03) | 0.98<br>(0.91-1.05) | 5x10 <sup>-6</sup>  | 1                   | .03                 | 2x10 <sup>-5</sup>  | .52                 | .006                | .15              |
| BCAC3_11 | 13281615  | T/C                  | 0.40 (0.56)                           | 1.08<br>(1.05-1.11) | 1.06<br>(1.01-1.11) | 1.18<br>(1.10-1.25) | 2x10 <sup>-7</sup>  | 6x10 <sup>-7</sup>  | 5x10 <sup>-12</sup> | 4x10 <sup>-8</sup>  | 2x10 <sup>-06</sup> | 4x10 <sup>-12</sup> | .73              |
| BCAC3_12 | 3817198   | T/C                  | 0.30 (0.14)                           | 1.07<br>(1.04-1.11) | 1.06<br>(1.02-1.11) | 1.17<br>(1.08-1.25) | 8x10 <sup>-6</sup>  | 10 <sup>-5</sup>    | 3x10 <sup>-9</sup>  | 2x10 <sup>-5</sup>  | 6x10 <sup>-5</sup>  | 10 <sup>-8</sup>    | .48              |
| BCAC3_16 | 889312    | A/C                  | 0.28 (0.54)                           | 1.13<br>(1.10-1.16) | 1.13<br>(1.09-1.18) | 1.27<br>(1.19-1.36) | 4x10 <sup>-6</sup>  | 3x10 <sup>-15</sup> | 7x10 <sup>-20</sup> | 2x10 <sup>-5</sup>  | 3x10 <sup>-14</sup> | 6x10 <sup>-19</sup> | .70              |
| BCAC3_18 | 4666451   | G/A                  | 0.41 (0.04)                           | 0.97<br>(0.94-1.00) | 0.98<br>(0.93-1.02) | 0.93<br>(0.87-0.99) | 5x10 <sup>-6</sup>  | .04                 | .00006              | 2x10 <sup>-7</sup>  | .10                 | 4x10 <sup>-5</sup>  | .30              |
| BCAC3_19 | 2107425   | C/T                  | 0.31 (0.44)                           | 0.96<br>(0.93-0.99) | 0.94<br>(0.90-0.98) | 0.95<br>(0.89-1.01) | 7x10 <sup>-6</sup>  | .01                 | .00002              | 4x10 <sup>-5</sup>  | .01                 | 5x10 <sup>-5</sup>  | .02              |
| BCAC3_20 | 7313833   | G/A                  | 0.32 (0.45)                           | 1.03<br>(1.00-1.06) | 1.03<br>(0.99-1.08) | 1.05<br>(0.98-1.12) | 6x10 <sup>-6</sup>  | .08                 | .0003               | 6x10 <sup>-6</sup>  | .20                 | .001                | .67              |
| BCAC3_23 | 981782    | A/C                  | 0.47 (0.37)                           | 0.96<br>(0.93-0.99) | 0.96<br>(0.92-1.01) | 0.92<br>(0.87-0.97) | .00008              | .003                | .000009             | .0004               | .01                 | 5x10 <sup>-5</sup>  | .07              |
| BCAC3_25 | 11235127  | G/A                  | 0.16 (0.41)                           | 0.98<br>(0.94-1.02) | 0.97<br>(0.92-1.01) | 1.00<br>(0.90-1.11) | .00006              | .26                 | .41                 | .00005              | .29                 | 0.72                | .67              |
| BCAC3_26 | 17157070  | A/G                  | 0.05 (0.12)                           | 1.03<br>(0.97-1.10) | 1.02<br>(0.95-1.09) | 1.24<br>(0.90-1.70) | .08                 | .33                 | .10                 | .07                 | .37                 | .08                 | .22              |

|          |          |     |             |                     |                     |                     |                     |                    |            |                     |                     |                     |     |
|----------|----------|-----|-------------|---------------------|---------------------|---------------------|---------------------|--------------------|------------|---------------------|---------------------|---------------------|-----|
| BCAC3_27 | 6469633  | T/C | 0.22 (0.29) | 1.02<br>(0.99-1.06) | 1.01<br>(0.97-1.06) | 1.06<br>(0.96-1.16) | $3 \times 10^{-7}$  | .26                | .002       | $7 \times 10^{-7}$  | .47                 | .009                | .31 |
| BCAC3_28 | 4331913  | C/T | 0.42 (0.32) | 1.01<br>(0.98-1.05) | 0.98<br>(0.94-1.03) | 1.04<br>(0.98-1.12) | .00003              | .41                | .005       | .0001               | .16                 | .008                | .61 |
| BCAC3_29 | 8051542  | C/T | 0.44 (0.20) | 1.09<br>(1.06-1.13) | 1.10<br>(1.05-1.16) | 1.19<br>(1.12-1.27) | $4 \times 10^{-6}$  | $4 \times 10^{-8}$ | $10^{-12}$ | $2 \times 10^{-5}$  | $2 \times 10^{-7}$  | $10^{-11}$          | .08 |
| BCAC3_30 | 6843340  | C/T | 0.48 (0.47) | 1.00<br>(0.97-1.03) | 0.99<br>(0.94-1.05) | 1.00<br>(0.94-1.06) | .0009               | .92                | .13        | .004                | .97                 | .30                 | .29 |
| BCAC3_31 | 2049621  | C/G | 0.09 (0.02) | 1.04<br>(0.99-1.09) | 1.06<br>(1.00-1.12) | 0.92<br>(0.74-1.14) | .0009               | .15                | .009       | .002                | .10                 | .02                 | .45 |
| BCAC3_33 | 10508468 | T/C | 0.39 (0.38) | 0.98<br>(0.96-1.01) | 0.99<br>(0.95-1.03) | 0.97<br>(0.91-1.03) | .002                | .30                | .02        | $7 \times 10^{-5}$  | .56                 | .02                 | .80 |
| BCAC3_35 | 13110927 | C/T | 0.47 (0.38) | 1.01<br>(0.98-1.04) | 1.00<br>(0.96-1.05) | 1.02<br>(0.96-1.07) | .0004               | .60                | .04        | $3 \times 10^{-5}$  | .86                 | .04                 | .61 |
| BCAC3_36 | 4954956  | C/T | 0.26 (0.29) | 0.97<br>(0.94-1.00) | 0.98<br>(0.94-1.02) | 0.94<br>(0.86-1.02) | .001                | .08                | .002       | $8 \times 10^{-6}$  | .21                 | .001                | .89 |
| BCAC3_37 | 6463266  | T/G | 0.19 (0.21) | 1.00<br>(0.97-1.04) | 1.01<br>(0.97-1.06) | 0.97<br>(0.88-1.08) | .0002               | .92                | .07        | .0008               | .70                 | .17                 | .44 |
| BCAC3_38 | 3852789  | A/C | 0.21 (0.27) | 1.00<br>(0.96-1.03) | 1.01<br>(0.97-1.06) | 0.96<br>(0.87-1.06) | .00003              | .89                | .04        | $5 \times 10^{-5}$  | .53                 | .03                 | .72 |
| BCAC3_39 | 12658840 | G/A | 0.29 (0.36) | 0.99<br>(0.96-1.02) | 0.99<br>(0.94-1.03) | 0.98<br>(0.92-1.05) | .00005              | .48                | .20        | .0002               | .76                 | .43                 | .61 |
| BCAC3_40 | 2298075  | C/A | 0.23 (0.15) | 0.97<br>(0.94-1.01) | 0.99<br>(0.94-1.03) | 0.92<br>(0.83-1.02) | .27                 | .17                | .08        | .0002               | .28                 | .005                | .68 |
| BCAC3_41 | 7307700  | G/A | 0.47 (0.49) | 1.02<br>(0.99-1.05) | 1.03<br>(0.98-1.07) | 1.04<br>(0.98-1.09) | .01                 | .21                | .02        | .002                | .43                 | .06                 | .36 |
| BCAC3_42 | 30099    | G/A | 0.08 (0.39) | 1.05<br>(1.01-1.10) | 1.06<br>(1.00-1.11) | 1.09<br>(0.96-1.24) | .003                | .02                | .001       | .002                | .07                 | .005                | .74 |
| BCAC3_50 | 3803662  | C/T | 0.25 (0.60) | 1.20<br>(1.16-1.24) | 1.23<br>(1.18-1.29) | 1.39<br>(1.29-1.49) | $3 \times 10^{-12}$ | $10^{-26}$         | $10^{-36}$ | $2 \times 10^{-11}$ | $3 \times 10^{-26}$ | $7 \times 10^{-36}$ | .95 |

<sup>1</sup>Coded to the minor allele in the UK-Search study. Reference allele/alternate allele (+ strand).

<sup>2</sup>Minor allele frequency.

<sup>3</sup> Test of homogeneity of the per allele odds ratio among studies.



**Supplementary table 4.** Haplotype analysis of seven tag SNPs in FGFR2.

| Haplotype <sup>1</sup> | Control<br>freq <sup>2</sup> | Case<br>freq <sup>2</sup> | OR <sup>3</sup> (95%CI) | OR <sup>3</sup> (95%CI) |
|------------------------|------------------------------|---------------------------|-------------------------|-------------------------|
| 1111111                | 0.184                        | 0.169                     | 1.04 (0.94-1.13)        | 0.80 (0.72-0.88)        |
| 2111111                | 0.022                        | 0.0169                    | 0.87 (0.69-1.09)        | 0.66 (0.53-0.84)        |
| 1211111                | 0.281                        | 0.248                     | 1                       | 0.77 (0.70-0.84)        |
| 1221111                | 0.114                        | 0.114                     | 1.13 (1.02-1.26)        | 0.87 (0.78-0.97)        |
| 1111221                | 0.161                        | 0.186                     | 1.31 (1.19-1.42)        | 1                       |
| 2112121                | 0.120                        | 0.130                     | 1.23 (1.11-1.36)        | 0.94 (0.85-1.05)        |
| 2112122                | 0.081                        | 0.094                     | 1.31 (1.19-1.50)        | 1.03 (0.91-1.16)        |

<sup>1</sup>Loci in order are rs11200012, rs3750817, rs17542768, rs1219643, rs17102287, rs2981582, rs1219639. 1 represents the commoner allele in the UK Search study controls. Positions shown in figure 3c.

<sup>2</sup> Estimated frequencies in 4,470 cases and 4,560 controls (Search study).

<sup>3</sup> Odds ratios relative to the 1211111 haplotype (the commonest haplotype carrying the allele 1 at rs2981582) as baseline.

<sup>4</sup> Odds ratios relative to the 1111221 haplotype (the commonest haplotype carrying the allele 2 at rs2981582) as baseline.

**Supplementary table 5.** Estimated haplotype frequencies in 80 UK and 84 Korean samples, for the 27 SNPs in *FGFR2* that were correlated with rs2981582 and could be genotyped by Taqman or Pyrosequencing.

| rs4752569 | rs35012336 | rs7895676 | rs10736303 | rs11200014 | rs2912781 | rs2912780 | rs2912779 | rs2981579 | rs2912778 | rs1078806 | rs2981578 | rs35054928 | rs11599804 | rs34032268 | rs4752571 | rs2981575 | rs1219648 | rs1219642 | rs2912774 | rs2936870 | rs2981584 | rs2860197 | rs2420946 | rs2162540 | rs2981582 | rs3135718 | UK    | KOREAN |
|-----------|------------|-----------|------------|------------|-----------|-----------|-----------|-----------|-----------|-----------|-----------|------------|------------|------------|-----------|-----------|-----------|-----------|-----------|-----------|-----------|-----------|-----------|-----------|-----------|-----------|-------|--------|
| 1         | 1          | 1         | 1          | 1          | 1         | 1         | 1         | 1         | 1         | 1         | 1         | 1          | 1          | 1          | 1         | 1         | 1         | 1         | 1         | 1         | 1         | 1         | 1         | 1         | 1         | 1         | 0.425 | 0.234  |
| 2         | 2          | 2         | 2          | 2          | 2         | 2         | 2         | 2         | 2         | 2         | 2         | 2          | 2          | 2          | 2         | 2         | 2         | 2         | 2         | 2         | 2         | 2         | 2         | 2         | 2         | 2         | 0.331 | 0.367  |
| 1         | 2          | 2         | 2          | 2          | 2         | 2         | 2         | 2         | 2         | 2         | 2         | 2          | 2          | 2          | 2         | 2         | 2         | 2         | 2         | 2         | 2         | 2         | 2         | 2         | 2         | 2         | 0.066 | 0.019  |
| 2         | 2          | 1         | 1          | 2          | 1         | 2         | 2         | 2         | 2         | 1         | 2         | 1          | 2          | 2          | 2         | 2         | 2         | 2         | 2         | 2         | 2         | 2         | 2         | 2         | 2         | 2         | 0.025 | 0.082  |
| 1         | 1          | 1         | 1          | 1          | 1         | 1         | 1         | 1         | 1         | 1         | 1         | 1          | 1          | 2          | 2         | 1         | 2         | 2         | 2         | 2         | 2         | 2         | 2         | 2         | 2         | 2         | 0.025 | n/a    |
| 1         | 1          | 1         | 1          | 1          | 1         | 1         | 1         | 1         | 1         | 1         | 1         | 1          | 1          | 1          | 1         | 1         | 1         | 1         | 1         | 1         | 2         | 2         | 2         | 2         | 2         | 2         | 0.016 | n/a    |
| 2         | 2          | 1         | 1          | 1          | 1         | 1         | 1         | 1         | 1         | 1         | 1         | 1          | 1          | 1          | 1         | 1         | 1         | 1         | 1         | 1         | 1         | 1         | 1         | 1         | 1         | 1         | 0.013 | n/a    |
| 2         | 1          | 1         | 1          | 2          | 1         | 2         | 2         | 2         | 1         | 2         | 1         | 2          | 2          | 2          | 2         | 2         | 2         | 2         | 2         | 2         | 2         | 2         | 2         | 2         | 2         | 2         | 0.012 | n/a    |
| 1         | 1          | 1         | 1          | 2          | 1         | 2         | 2         | 2         | 1         | 2         | 1         | 1          | 1          | 1          | 1         | 1         | 1         | 1         | 1         | 1         | 1         | 2         | 2         | 2         | 2         | 2         | 0.012 | n/a    |
| 1         | 2          | 1         | 1          | 2          | 1         | 2         | 2         | 2         | 1         | 2         | 1         | 2          | 2          | 2          | 2         | 2         | 2         | 2         | 2         | 2         | 2         | 2         | 2         | 2         | 2         | 2         | 0.010 | n/a    |
| 2         | 1          | 1         | 1          | 2          | 1         | 1         | 1         | 1         | 1         | 2         | 1         | 1          | 2          | 1          | 2         | 1         | 1         | 1         | 1         | 1         | 1         | 1         | 1         | 1         | 1         | 1         | n/a   | 0.038  |
| 2         | 1          | 1         | 1          | 2          | 1         | 1         | 1         | 1         | 1         | 2         | 1         | 1          | 2          | 1          | 1         | 1         | 1         | 1         | 1         | 1         | 1         | 1         | 1         | 1         | 2         | 1         | n/a   | 0.032  |
| 2         | 2          | 1         | 1          | 2          | 1         | 2         | 2         | 2         | 1         | 2         | 1         | 2          | 2          | 2          | 2         | 2         | 2         | 2         | 1         | 2         | 2         | 2         | 2         | 2         | 2         | 2         | n/a   | 0.025  |
| 1         | 1          | 1         | 1          | 1          | 1         | 1         | 1         | 1         | 1         | 1         | 1         | 1          | 1          | 1          | 1         | 2         | 1         | 1         | 1         | 1         | 1         | 1         | 1         | 1         | 1         | 1         | n/a   | 0.019  |
| 2         | 2          | 1         | 1          | 2          | 1         | 1         | 1         | 1         | 1         | 2         | 1         | 1          | 2          | 1          | 1         | 1         | 1         | 1         | 1         | 1         | 1         | 1         | 1         | 1         | 1         | 1         | n/a   | 0.019  |
| 2         | 2          | 2         | 2          | 2          | 1         | 2         | 2         | 2         | 2         | 2         | 2         | 2          | 2          | 2          | 2         | 2         | 2         | 2         | 2         | 2         | 2         | 2         | 2         | 2         | 2         | 2         | n/a   | 0.013  |
| 2         | 2          | 1         | 1          | 2          | 1         | 1         | 1         | 1         | 1         | 2         | 1         | 1          | 2          | 1          | 1         | 1         | 1         | 1         | 1         | 1         | 1         | 1         | 1         | 1         | 2         | 1         | n/a   | 0.013  |
| 2         | 2          | 1         | 1          | 2          | 1         | 1         | 1         | 1         | 1         | 2         | 1         | 1          | 2          | 1          | 2         | 1         | 2         | 2         | 2         | 2         | 2         | 2         | 2         | 2         | 2         | 2         | n/a   | 0.010  |

**Supplementary table 6.** Estimated  $r^2$  for 27 SNPs in intron 2 of FGFR2, in 80 samples from the UK Search study (lower left triangle) and 84 samples from Korea (upper right triangle). SNPs in bold italic were chosen as tag SNPs. rs4752569 and rs35012336 were not considered in the Korean case-control study since they were strongly excluded in the UK study.

|                   | rs4752569 | rs35012336 | rs7895676 | <b>rs10736303</b> | <b>rs11200014</b> | rs2912781 | <b>rs2912780</b> | rs2912779 | rs2981579 | rs2912778 | rs1078806 | <b>rs2981578</b> | rs35054928 | rs11599804 | rs34032268 | <b>rs4752571</b> | <b>rs2981575</b> | rs1219648 | <b>rs1219642</b> | <b>rs2912774</b> | <b>rs2936870</b> | rs2981584 | rs2860197 | <b>rs2420946</b> | rs2162540 | <b>rs2981582</b> | <b>rs3135718</b> |
|-------------------|-----------|------------|-----------|-------------------|-------------------|-----------|------------------|-----------|-----------|-----------|-----------|------------------|------------|------------|------------|------------------|------------------|-----------|------------------|------------------|------------------|-----------|-----------|------------------|-----------|------------------|------------------|
| <b>rs4752569</b>  |           | 0.49       | 0.22      | 0.22              | 0.81              | 0.17      | 0.38             | 0.38      | 0.38      | 0.22      | 0.83      | 0.24             | 0.40       | 0.82       | 0.34       | 0.54             | 0.34             | 0.44      | 0.42             | 0.39             | 0.39             | 0.42      | 0.39      | 0.40             | 0.41      | 0.54             | 0.35             |
| <b>rs35012336</b> | 0.66      |            | 0.45      | 0.46              | 0.61              | 0.42      | 0.70             | 0.71      | 0.70      | 0.43      | 0.62      | 0.45             | 0.67       | 0.59       | 0.68       | 0.56             | 0.60             | 0.75      | 0.74             | 0.69             | 0.68             | 0.73      | 0.68      | 0.69             | 0.68      | 0.56             | 0.61             |
| rs7895676         | 0.46      | 0.68       |           | 0.90              | 0.33              | 0.83      | 0.61             | 0.60      | 0.60      | 0.93      | 0.33      | 0.89             | 0.63       | 0.31       | 0.60       | 0.41             | 0.53             | 0.54      | 0.50             | 0.54             | 0.51             | 0.54      | 0.46      | 0.46             | 0.48      | 0.36             | 0.45             |
| <b>rs10736303</b> | 0.49      | 0.71       | 0.97      |                   | 0.33              | 0.86      | 0.67             | 0.67      | 0.67      | 0.81      | 0.34      | 0.95             | 0.61       | 0.29       | 0.56       | 0.42             | 0.57             | 0.53      | 0.54             | 0.58             | 0.53             | 0.53      | 0.47      | 0.48             | 0.48      | 0.33             | 0.38             |
| rs11200014        | 0.65      | 0.84       | 0.73      | 0.77              |                   | 0.28      | 0.49             | 0.49      | 0.49      | 0.29      | 0.99      | 0.32             | 0.49       | 0.93       | 0.48       | 0.61             | 0.40             | 0.52      | 0.51             | 0.48             | 0.48             | 0.50      | 0.45      | 0.46             | 0.46      | 0.60             | 0.41             |
| rs2912781         | 0.50      | 0.73       | 0.95      | 0.97              | 0.73              |           | 0.58             | 0.57      | 0.57      | 0.77      | 0.30      | 0.79             | 0.53       | 0.26       | 0.52       | 0.34             | 0.49             | 0.50      | 0.48             | 0.56             | 0.49             | 0.47      | 0.44      | 0.42             | 0.43      | 0.31             | 0.43             |
| <b>rs2912780</b>  | 0.60      | 0.83       | 0.76      | 0.79              | 0.97              | 0.76      |                  | 1.00      | 1.00      | 0.58      | 0.51      | 0.65             | 0.95       | 0.46       | 0.95       | 0.66             | 0.88             | 0.83      | 0.83             | 0.78             | 0.77             | 0.82      | 0.76      | 0.77             | 0.76      | 0.54             | 0.67             |
| rs2912779         | 0.60      | 0.83       | 0.76      | 0.79              | 0.97              | 0.76      | 1.00             |           | 1.00      | 0.57      | 0.51      | 0.65             | 0.94       | 0.46       | 0.95       | 0.66             | 0.88             | 0.82      | 0.83             | 0.78             | 0.77             | 0.82      | 0.76      | 0.77             | 0.76      | 0.54             | 0.68             |
| rs2981579         | 0.57      | 0.81       | 0.74      | 0.78              | 0.97              | 0.74      | 1.00             | 1.00      |           | 0.57      | 0.51      | 0.64             | 0.95       | 0.46       | 0.95       | 0.66             | 0.88             | 0.83      | 0.83             | 0.78             | 0.77             | 0.82      | 0.76      | 0.77             | 0.76      | 0.54             | 0.67             |
| rs2912778         | 0.50      | 0.73       | 0.95      | 0.97              | 0.73              | 1.00      | 0.76             | 0.76      | 0.74      |           | 0.29      | 0.90             | 0.58       | 0.27       | 0.59       | 0.35             | 0.49             | 0.49      | 0.48             | 0.50             | 0.48             | 0.47      | 0.43      | 0.44             | 0.41      | 0.33             | 0.46             |
| rs1078806         | 0.64      | 0.84       | 0.75      | 0.78              | 1.00              | 0.75      | 0.97             | 0.97      | 0.97      | 0.75      |           | 0.32             | 0.50       | 0.95       | 0.48       | 0.62             | 0.41             | 0.52      | 0.53             | 0.50             | 0.49             | 0.51      | 0.47      | 0.47             | 0.48      | 0.61             | 0.42             |
| <b>rs2981578</b>  | 0.50      | 0.72       | 0.97      | 0.95              | 0.72              | 0.97      | 0.75             | 0.75      | 0.74      | 0.97      | 0.74      |                  | 0.64       | 0.32       | 0.60       | 0.44             | 0.58             | 0.55      | 0.55             | 0.59             | 0.55             | 0.55      | 0.48      | 0.50             | 0.50      | 0.35             | 0.42             |
| rs35054928        | 0.60      | 0.83       | 0.76      | 0.79              | 0.97              | 0.76      | 1.00             | 1.00      | 1.00      | 0.76      | 0.97      | 0.74             |            | 0.52       | 0.97       | 0.72             | 0.90             | 0.85      | 0.84             | 0.79             | 0.78             | 0.84      | 0.77      | 0.80             | 0.79      | 0.60             | 0.68             |
| rs11599804        | 0.61      | 0.85       | 0.75      | 0.77              | 1.00              | 0.75      | 0.97             | 0.97      | 0.97      | 0.75      | 1.00      | 0.74             | 0.97       |            | 0.50       | 0.66             | 0.44             | 0.55      | 0.54             | 0.51             | 0.52             | 0.54      | 0.49      | 0.50             | 0.50      | 0.66             | 0.41             |
| rs34032268        | 0.51      | 0.71       | 0.67      | 0.69              | 0.84              | 0.67      | 0.88             | 0.88      | 0.87      | 0.67      | 0.85      | 0.65             | 0.88       | 0.85       |            | 0.73             | 0.90             | 0.92      | 0.92             | 0.84             | 0.94             | 0.92      | 0.87      | 0.87             | 0.87      | 0.66             | 0.79             |
| rs4752571         | 0.56      | 0.76       | 0.67      | 0.69              | 0.90              | 0.67      | 0.88             | 0.88      | 0.87      | 0.67      | 0.90      | 0.66             | 0.88       | 0.90       | 0.95       |                  | 0.65             | 0.82      | 0.82             | 0.78             | 0.76             | 0.82      | 0.75      | 0.76             | 0.77      | 0.55             | 0.66             |
| <b>rs2981575</b>  | 0.62      | 0.85       | 0.74      | 0.77              | 1.00              | 0.74      | 0.98             | 0.98      | 0.97      | 0.74      | 1.00      | 0.73             | 0.98       | 1.00       | 0.85       | 0.90             |                  | 0.81      | 0.81             | 0.76             | 0.74             | 0.81      | 0.74      | 0.74             | 0.75      | 0.54             | 0.65             |
| rs1219648         | 0.57      | 0.76       | 0.67      | 0.69              | 0.90              | 0.67      | 0.88             | 0.88      | 0.87      | 0.67      | 0.90      | 0.65             | 0.88       | 0.90       | 0.95       | 1.00             | 0.90             |           | 1.00             | 0.94             | 0.92             | 1.00      | 0.93      | 0.94             | 0.94      | 0.69             | 0.83             |
| <b>rs1219642</b>  | 0.56      | 0.76       | 0.67      | 0.69              | 0.89              | 0.67      | 0.88             | 0.88      | 0.87      | 0.67      | 0.90      | 0.65             | 0.88       | 0.90       | 0.95       | 1.00             | 0.90             | 1.00      |                  | 0.94             | 0.92             | 0.99      | 0.93      | 0.94             | 0.93      | 0.68             | 0.81             |
| <b>rs2912774</b>  | 0.52      | 0.73       | 0.68      | 0.70              | 0.86              | 0.68      | 0.90             | 0.90      | 0.89      | 0.68      | 0.87      | 0.66             | 0.90       | 0.87       | 0.97       | 0.97             | 0.87             | 0.97      | 0.97             |                  | 0.86             | 0.93      | 0.89      | 0.90             | 0.89      | 0.64             | 0.77             |
| <b>rs2936870</b>  | 0.40      | 0.60       | 0.61      | 0.64              | 0.77              | 0.61      | 0.78             | 0.78      | 0.79      | 0.61      | 0.74      | 0.59             | 0.78       | 0.75       | 0.86       | 0.86             | 0.76             | 0.86      | 0.86             | 0.91             |                  | 0.90      | 0.85      | 0.86             | 0.85      | 0.63             | 0.73             |
| rs2981584         | 0.53      | 0.74       | 0.69      | 0.71              | 0.87              | 0.69      | 0.91             | 0.91      | 0.90      | 0.69      | 0.87      | 0.67             | 0.90       | 0.87       | 0.98       | 0.98             | 0.88             | 0.98      | 0.98             | 1.00             | 0.89             |           | 0.92      | 0.92             | 0.94      | 0.67             | 0.81             |
| rs2860197         | 0.50      | 0.70       | 0.65      | 0.68              | 0.82              | 0.65      | 0.86             | 0.86      | 0.85      | 0.65      | 0.82      | 0.64             | 0.86       | 0.83       | 0.92       | 0.93             | 0.83             | 0.93      | 0.92             | 0.97             | 0.86             | 0.95      |           | 0.99             | 0.98      | 0.72             | 0.88             |
| <b>rs2420946</b>  | 0.48      | 0.63       | 0.65      | 0.66              | 0.78              | 0.65      | 0.80             | 0.80      | 0.78      | 0.65      | 0.79      | 0.63             | 0.80       | 0.77       | 0.87       | 0.87             | 0.77             | 0.90      | 0.87             | 0.92             | 0.80             | 0.90      | 0.95      |                  | 0.99      | 0.73             | 0.88             |
| rs2162540         | 0.50      | 0.70       | 0.65      | 0.68              | 0.82              | 0.65      | 0.86             | 0.86      | 0.85      | 0.65      | 0.82      | 0.64             | 0.86       | 0.83       | 0.92       | 0.93             | 0.83             | 0.93      | 0.92             | 0.97             | 0.86             | 0.95      | 1.00      | 0.95             |           | 0.72             | 0.86             |
| <b>rs2981582</b>  | 0.49      | 0.68       | 0.64      | 0.66              | 0.79              | 0.64      | 0.84             | 0.84      | 0.85      | 0.64      | 0.80      | 0.64             | 0.84       | 0.81       | 0.90       | 0.90             | 0.81             | 0.90      | 0.90             | 0.95             | 0.89             | 0.93      | 0.98      | 0.93             | 0.98      |                  | 0.62             |
| rs3135718         | 0.47      | 0.67       | 0.62      | 0.64              | 0.79              | 0.62      | 0.83             | 0.83      | 0.82      | 0.62      | 0.79      | 0.60             | 0.83       | 0.80       | 0.90       | 0.90             | 0.80             | 0.90      | 0.90             | 0.95             | 0.83             | 0.93      | 0.98      | 0.92             | 0.98      | 0.95             |                  |

**Supplementary table 7.** Summary odds ratios for the 14 SNPs typed in the fine-scale mapping genotyping of the FGFR2 locus.

| SNP        | European <sup>1</sup> |                       |                     |                               | Asian <sup>2</sup> |                       |                     |                               |
|------------|-----------------------|-----------------------|---------------------|-------------------------------|--------------------|-----------------------|---------------------|-------------------------------|
|            | maf <sup>3</sup>      | Per allele OR (95%CI) | p-trend             | Homogeneity test <sup>4</sup> | maf <sup>3</sup>   | Per allele OR (95%CI) | p-trend             | Homogeneity test <sup>4</sup> |
| rs4752569  | 0.53                  | 1.13 (1.07-1.20)      | 3x10 <sup>-5</sup>  | -                             | -                  | -                     | -                   | -                             |
| rs35012336 | 0.44                  | 1.19 (1.12-1.26)      | 10 <sup>-8</sup>    | -                             | -                  | -                     | -                   | -                             |
| rs10736303 | 0.46                  | 1.25 (1.18-1.32)      | 5x10 <sup>-14</sup> | .30                           | 0.52               | 1.26 (1.18-1.35)      | 2x10 <sup>-11</sup> | .65                           |
| rs11200014 | -                     | -                     | -                   | -                             | 0.26               | 1.16 (1.05-1.28)      | .004                | .23                           |
| rs29812780 | 0.40                  | 1.25 (1.18-1.33)      | 3x10 <sup>-14</sup> | .23                           | 0.42               | 1.21 (1.13-1.31)      | 10 <sup>-7</sup>    | .34                           |
| rs2981578  | 0.46                  | 1.26 (1.19-1.34)      | 10 <sup>-15</sup>   | .54                           | 0.50               | 1.25 (1.17-1.34)      | 2x10 <sup>-11</sup> | .92                           |
| rs4752571  | -                     | -                     | -                   | -                             | 0.33               | 1.17 (1.09-1.26)      | 10 <sup>-5</sup>    | .44                           |
| rs2981575  | 0.39                  | 1.27 (1.20-1.35)      | 9x10 <sup>-16</sup> | .11                           | 0.40               | 1.21 (1.13-1.30)      | 4x10 <sup>-8</sup>  | .18                           |
| rs1219642  | 0.39                  | 1.27 (1.20-1.35)      | 3x10 <sup>-16</sup> | .10                           | 0.37               | 1.21 (1.13-1.30)      | 9x10 <sup>-8</sup>  | .50                           |
| rs2912774  | 0.39                  | 1.26 (1.19-1.34)      | 3x10 <sup>-15</sup> | .13                           | 0.38               | 1.19 (1.11-1.27)      | 8x10 <sup>-7</sup>  | .23                           |
| rs2936870  | 0.39                  | 1.26 (1.19-1.34)      | 5x10 <sup>-15</sup> | .10                           | 0.37               | 1.20 (1.12-1.29)      | 2x10 <sup>-7</sup>  | .32                           |
| rs2420946  | 0.38                  | 1.27 (1.20-1.35)      | 5x10 <sup>-16</sup> | .06                           | 0.37               | 1.17 (1.09-1.26)      | 7x10 <sup>-6</sup>  | .48                           |
| rs2981582  | 0.38                  | 1.27 (1.20-1.34)      | 8x10 <sup>-16</sup> | .07                           | 0.30               | 1.19 (1.11-1.28)      | 2x10 <sup>-6</sup>  | .05                           |
| rs3135718  | -                     | -                     | -                   | -                             | 0.38               | 1.15 (1.07-1.23)      | 7x10 <sup>-5</sup>  | .59                           |

<sup>1</sup>SEARCH and MEC-W studies.

<sup>2</sup>MEC-J, TBCS, SBCP, BCST studies.

<sup>3</sup>Minor allele frequency.

<sup>4</sup>p-value for homogeneity of the per allele OR among studies.

Supplementary table 8. Details of 29 SNPs correlated with rs2981582 at  $r^2 > 0.6$ .

| rs Number  | Alleles <sup>1</sup> | Position <sup>2</sup> | Log-likelihood Difference <sup>3</sup> |       |       | % conservation over 75 nucleotides <sup>4</sup> |     |     |                 |     |     |     |     | Allele <sup>5</sup> |     |                |     |     |     |  |
|------------|----------------------|-----------------------|----------------------------------------|-------|-------|-------------------------------------------------|-----|-----|-----------------|-----|-----|-----|-----|---------------------|-----|----------------|-----|-----|-----|--|
|            |                      |                       | European                               | Asian | Total | Chi                                             | Rhe | Dog | Cow             | Rat | Mou | Opo | Chi | Rhe                 | Dog | Cat            | Rat | Mou | Opo |  |
| rs4752569  | T/A                  | 123321680             | 8.43                                   |       | 8.43  | 96                                              | 84  | 0   | 0               | 0   | 0   | 0   | 2   | 2                   | -   | -              | -   | -   | -   |  |
| rs35012336 | -/C                  | 123323185             | 4.70                                   |       | 4.70  | 95                                              | 93  | 0   | 23              | 0   | 45  | 0   | 2   | 2                   | -   | 1N             | -   | 1   |     |  |
| rs33971856 | - /G                 | 123323189             |                                        |       |       | 99                                              | 93  | 0   | 23              | 0   | 51  | 0   | 1   | 1                   | -   | g              | -   | g   | -   |  |
| rs7895676  | T/C                  | 123323987             | 0                                      | 0     | 0     | 99                                              | 91  | 0   | 15              | 0   | 0   | 0   | 2   | 2N                  | -   | -              | -   | -   | -   |  |
| rs10736303 | A/G                  | 123324447             | 0.86                                   | 0.64  | 1.50  | 99                                              | 91  | 72  | 68              | 52  | 44  | 0   | 2   | 2                   | 2   | 2              | 1   | 1   | -   |  |
| rs11200014 | C/T                  | 123324920             | 0.41                                   | 4.22  | 4.62  | 100                                             | 92  | 62  | 50              | 37  | 52  | 0   | 1   | 1                   | 1   | 0              | g   | g   | -   |  |
| rs35393331 | -/ TAAA              | 123325378             |                                        |       |       | 100                                             | 80  | 0   | 0               | 0   | 0   | 0   | 1   | g                   | -   | -              | -   | -   | -   |  |
| rs2912781  | A/G                  | 123326484             | 0.07                                   | 1.55  | 1.62  | 97                                              | 84  | 0   | 21              | 0   | 0   | 0   | 2   | 1                   | -   | 2N             | -   | -   | -   |  |
| rs2912780  | A/G                  | 123327107             | 0.49                                   | 3.68  | 4.17  | 99                                              | 89  | 65  | 59              | 0   | 0   | 0   | 1   | 2                   | 1   | 1N             | -   | -   | -   |  |
| rs2912779  | G/A                  | 123327172             | -0.83                                  | 5.19  | 4.36  | 99                                              | 93  | 69  | 60              | 0   | 0   | 0   | 1   | 1                   | 1   | 1              | -   | -   | -   |  |
| rs2981579  | G/A                  | 123327325             | 4.71                                   | 1.98  | 6.69  | 100                                             | 95  | 73  | 76              | 0   | 0   | 0   | 1   | 1                   | 2   | 2N             | -   | -   | -   |  |
| rs2912778  | T/C                  | 123328644             | 0.07                                   | 0.37  | 0.44  | 99                                              | 93  | 65  | 57              | 0   | 37  | 0   | 2   | 2                   | 2N  | 2N             | -   | g   | -   |  |
| rs1078806  | A/G                  | 123328965             | -0.34                                  | 4.25  | 3.91  | 97                                              | 88  | 75  | 71              | 58  | 75  | 0   | 1   | 1                   | 1   | 1N             | 1   | 1   | -   |  |
| rs2981578  | A/G                  | 123330301             | -0.78                                  | 2.41  | 1.63  | 99                                              | 91  | 64  | 81              | 75  | 69  | 0   | 2   | 2                   | 1   | 2              | 2N  | 2N  | -   |  |
| rs35054928 | -/C                  | 123330423             | -0.83                                  | 2.05  | 1.22  | 100                                             | 93  | 48  | 50 <sup>s</sup> | 53  | 52  | 0   | 1   | 1                   | 1N  | 1 <sup>s</sup> | 1N  | 0   | -   |  |

|            |     |           |       |      |      |     |    |    |     |                 |                 |    |   |   |    |    |                 |                 |          |
|------------|-----|-----------|-------|------|------|-----|----|----|-----|-----------------|-----------------|----|---|---|----|----|-----------------|-----------------|----------|
| rs11599804 | C/T | 123330654 | -0.79 | 5.37 | 4.58 | 84  | 83 | 39 | 63  | 36              | 36              | 0  | 1 | 2 | 1N | g  | g               | g               | -        |
| rs34032268 | A/C | 123331515 | -1.09 | 3.43 | 2.34 | 99  | 87 | 0  | 0   | 0               | 0               | 0  | 2 | 2 | -  | -  | -               | -               | -        |
| rs4752571  | T/C | 123332557 | -1.05 | 6.38 | 5.33 | 100 | 95 | 60 | 84  | 80              | 32              | 0  | 2 | 2 | 2N | 2  | 2N              | 2N              | -        |
| rs2981575  | A/G | 123336106 | -1.44 | 3.80 | 2.35 | 99  | 0  | 69 | 63  | 49              | 46*             | 51 | 2 | - | 1  | 1  | 1N              | -               | 1N       |
| rs1219648  | A/G | 123336180 | -0.56 | 4.31 | 3.75 | 100 | 0  | 77 | 71  | 52*             | -               | 55 | 1 | - | 1  | 1  | 2N              | -               | 1N       |
| rs1219642  | A/G | 123338379 | -0.95 | 5.00 | 4.05 | 96  | 0  | 0  | 0   | 29 <sup>§</sup> | 31 <sup>§</sup> | 48 | 1 | - | -  | -  | 1N <sup>§</sup> | 1N <sup>§</sup> | <i>g</i> |
| rs2912774  | G/T | 123338652 | -1.09 | 5.49 | 4.40 | 100 | 0  | 63 | 67  | -               | 69*             | 32 | 2 | - | g  | 0  | -               | -               | -        |
| rs2936870  | G/A | 123338892 | -0.59 | 5.30 | 4.71 | 100 | 0  | 71 | 89  | 87              | 88              | 65 | 2 | - | 2N | 2  | 2               | 2N              | 2N       |
| rs2981584  | C/A | 123340206 | -1.08 | 4.36 | 3.29 | 99  | 0  | 55 | 64* | 61              | 61              | 4  | 2 | - | 2N | 0  | 1N              | 1N              | -        |
| rs2860197  | A/G | 123341292 | -0.82 | 5.93 | 5.11 | 97  | 0  | 64 | 69  | 65              | 63              | 0  | 1 | - | 0  | 1  | 1N              | 1N              | -        |
| rs2420946  | G/A | 123341314 | -1.15 | 6.51 | 5.36 | 99  | 0  | 64 | 69  | 65              | 63              | 42 | 2 | - | 0  | 2  | 2N              | 2N              | 2N       |
| rs2162540  | A/G | 123342126 | -0.82 | 6.18 | 5.36 | 97  | 0  | 63 | 49  | 39*             | 51              | 49 | 1 | - | 1N | 2N | 0               | g               | 2N       |
| rs2981582  | G/A | 123342307 | -0.68 | 6.78 | 6.10 | 100 | 0  | 87 | 85  | 88              | 87              | 75 | 1 | - | 1N | 1N | 1N              | 1N              | 2N       |
| rs3135718  | A/G | 123343859 | -1.59 | 7.63 | 6.04 | 100 | 0  | 79 | 85  | 76              | 77              | 63 | 2 | - | 2  | 2  | 0               | 0               | 2N       |

<sup>1</sup> Allele that is in LD with the commoner G allele in rs2981582 (and hence associated with the lower risk) listed first

<sup>2</sup> build 36.2 position on chromosome 10

<sup>3</sup> log-likelihood difference relative to rs7895676, in European and Asian populations (see methods for computation of these likelihoods).

<sup>4</sup> Chi=Chimp, Rhe=Rhesus, Mou=mouse, Opo=opossum (<http://pipeline.lbl.gov/methods.shtml>)<sup>29-31</sup>

<sup>5</sup> Chi=Chimp, Rhe=Rhesus, Mou=mouse, Opo=opossum; 2=rare/high-risk allele, 1=common allele, 0=neither allele, g=gap in sequence, -=no data (no alignment), N=no conservation of adjacent nucleotide, ie SNP site. Data from Ensembl (<http://www.emsembl.org>) except: italics=data from UCSC (<http://genome.ucsc.edu/>), <sup>§</sup>=data from Vista (<http://pipeline.lbl.gov/methods.shtml>), \*homology ignoring gap in alignment.

**Supplementary table 9.** Odds ratios for breast carcinoma-in-situ (CIS), versus controls, in stage 3, for the 5 SNPs reaching  $p < 10^{-7}$ .

| SNP rs number | Per allele OR (95%CI) | HetOR (95%CI)       | HomOR (95%CI)       | p-trend (CIS vs controls) | p-trend (CIS vs invasive) |
|---------------|-----------------------|---------------------|---------------------|---------------------------|---------------------------|
| rs2981582     | 1.25<br>(1.14-1.37)   | 1.11<br>(0.96-1.30) | 1.62<br>(1.34-1.96) | $6 \times 10^{-7}$        | .67                       |
| rs3803662     | 1.18<br>(1.05-1.33)   | 1.14<br>(0.97-1.35) | 1.45<br>(1.10-1.91) | .0006                     | .95                       |
| rs8051542     | 1.30<br>(1.17-1.44)   | 1.31<br>(1.14-1.51) | 1.66<br>(1.31-2.09) | $10^{-7}$                 | .007                      |
| rs13281615    | 1.07<br>(0.96-1.19)   | 1.18<br>(1.00-1.39) | 1.10<br>(0.88-1.37) | .06                       | .21                       |
| rs3817198     | 1.07<br>(0.97-1.19)   | 1.04<br>(0.90-1.20) | 1.18<br>(0.94-1.49) | .25                       | .71                       |

**Supplementary table 10.** Per allele odds ratios by age at breast cancer diagnosis in stage 3, for the five independent SNPs reaching  $p < 10^{-7}$ .

| SNP rs number | <40                 | 40-49               | 50-59               | 60+                 | p-trend |
|---------------|---------------------|---------------------|---------------------|---------------------|---------|
| rs2981582     | 1.39<br>(1.23-1.56) | 1.24<br>(1.16-1.34) | 1.21<br>(1.15-1.28) | 1.26<br>(1.20-1.32) | .40     |
| rs3803662     | 1.36<br>(1.16-1.60) | 1.26<br>(1.16-1.36) | 1.22<br>(1.15-1.29) | 1.20<br>(1.14-1.26) | .13     |
| rs8051542     | 1.11<br>(0.97-1.27) | 1.17<br>(1.08-1.27) | 1.17<br>(1.11-1.24) | 1.08<br>(1.03-1.14) | .13     |
| rs13281615    | 1.06<br>(0.91-1.23) | 1.07<br>(0.99-1.16) | 1.14<br>(1.08-1.20) | 1.11<br>(1.06-1.17) | .47     |
| rs3817198     | 1.10<br>(0.96-1.27) | 1.14<br>(1.05-1.24) | 1.05<br>(1.00-1.11) | 1.06<br>(1.01-1.11) | .21     |

<sup>1</sup> Test for trend in odds ratios by age



**Supplementary table 11.** Per allele odds ratios for the presence of a positive family history of breast cancer and for bilaterality in relation to genotype, based on a case only analysis in stage 3, for the five independent SNPs reaching  $p < 10^{-7}$  in the case-control analysis.

| SNP rs number | Family History <sup>1</sup> |         | Bilaterality <sup>2</sup> |         |
|---------------|-----------------------------|---------|---------------------------|---------|
|               | Per allele OR               | p-trend | Per allele OR             | p-trend |
| rs2981582     | 1.07 (1.02-1.12)            | .02     | 1.18 (1.03-1.37)          | .02     |
| rs3803662     | 1.08 (1.01-1.15)            | .03     | 1.13 (0.88-1.44)          | .36     |
| rs8051542     | 1.01 (0.96-1.07)            | .64     | 1.09 (0.93-1.28)          | .26     |
| rs13281615    | 1.06 (1.00-1.12)            | .05     | 0.99 (.85-1.16)           | .91     |
| rs3817198     | 1.01 (0.95-1.07)            | .77     | 1.06 (0.91-1.23)          | .46     |

<sup>1</sup>Based on 3275 cases with a positive family history from 20 studies, and 14,028 cases without a family history from these studies.

<sup>2</sup>Based on 422 known bilateral cases from 9 studies, and 8012 unilateral cases from these studies.

## References

1. Spurdle, A.B. *et al.* CYP17 promoter polymorphism and breast cancer in Australian women under age forty years. *Journal of the National Cancer Institute* **92**, 1674-1681 (2000).
2. Spurdle, A.B. *et al.* Androgen receptor exon 1 CAG repeat length and breast cancer in women before age forty years. *Journal of the National Cancer Institute* **91**, 961-966 (1999).
3. Lo, Y.L. *et al.* Breast cancer risk associated with genotypic polymorphism of the mitosis-regulating gene Aurora-A/STK15/BTAK. *International Journal of Cancer* **115**, 276-283 (2005).
4. Cheng, T.C. *et al.* Breast cancer risk associated with genotype polymorphism of the catechol estrogen-metabolizing genes: A multigenic study on cancer susceptibility. *International Journal of Cancer* **113**, 345-353 (2005).
5. Bojesen, S.E., Tybjaerg-Hansen, A., Axelsson, C.K. & Nordestgaard, B.G. No association of breast cancer risk with integrin beta(3) (ITGB3) Leu33Pro genotype. *British Journal of Cancer* **93**, 167-171 (2005).
6. Weischer, M., Bojesen, S.E., Tybjaerg-Hansen, A., Axelsson, C.K. & Nordestgaard, B.G. Increased risk of breast cancer associated with CHEK2\*1100delC. *Journal of Clinical Oncology* . 2007.  
Ref Type: In Press
7. Pesch, B. *et al.* Factors modifying the association between hormone-replacement therapy and breast cancer risk. *European Journal of Epidemiology* **20**, 699-711 (2005).
8. Dork, T. *et al.* Spectrum of ATM gene mutations in a hospital-based series of unselected breast cancer patients. *Cancer Research* **61**, 7608-7615 (2001).
9. Kilpivaara, O. *et al.* Correlation of CHEK2 protein expression and c.1100delC mutation status with tumor characteristics among unselected breast cancer patients. *International Journal of Cancer* **113**, 575-580 (2005).
10. Tommiska, J. *et al.* Breast cancer patients with p53 pro72 homozygous genotype have a poorer survival. *Clinical Cancer Research* **11**, 5098-5103 (2005).
11. Syrjäkoski, K. *et al.* Population-based study of BRCA1 and BRCA2 mutations in 1035 unselected Finnish breast cancer patients. *Journal of the National Cancer Institute* **92**, 1529-1531 (2000).
12. Mann, G.J. *et al.* Analysis of cancer risk and BRCA1 and BRCA2 mutation prevalence in the kConFab familial breast cancer resource. *Breast Cancer Research* **8**, (2006).
13. Hartikainen, J.M. *et al.* An autosome-wide scan for linkage disequilibrium-based association in sporadic breast cancer cases in eastern Finland: Three candidate regions found. *Cancer Epidemiology Biomarkers & Prevention* **14**, 75-80 (2005).

14. de Bock,G.H. *et al.* Tumour characteristics and prognosis of breast cancer patients carrying the germline CHEK2\*1100delC variant. *Journal of Medical Genetics* **41**, 731-735 (2004).
15. Olson,J.E. *et al.* A comprehensive examination of CYP19 variation and risk of breast cancer using two haplotype-tagging approaches. *Breast Cancer Research and Treatment* . 2007.  
Ref Type: In Press
16. Giles GG & English DR. Nutrition and lifestyle: opportunities for cancer prevention. IARC Scientific Publications No 156. Riboli E,L.R. (ed.) (IARC, Lyon,2002).
17. Kolonel,L.N. *et al.* A multiethnic cohort in Hawaii and Los Angeles: Baseline characteristics. *American Journal of Epidemiology* **151**, 346-357 (2000).
18. Hankinson,S.E. *et al.* Plasma sex steroid hormone levels and risk of breast cancer in postmenopausal women. *Journal of the National Cancer Institute* **90**, 1292-1299 (1998).
19. Garcia-Closas,M. *et al.* Polymorphisms in DNA double-strand break repair genes and risk of breast cancer: two population-based studies in USA and Poland, and meta-analyses. *Human Genetics* **119**, 376-388 (2006).
20. Verhoog,L.C. *et al.* Large regional differences in the frequency of distinct BRCA1/BRCA2 mutations in 517 Dutch breast and/or ovarian cancer families. *European Journal of Cancer* **37**, 2082-2090 (2001).
21. Wedren,S. *et al.* Oestrogen receptor alpha gene haplotype and postmenopausal breast cancer risk: a case control study. *Breast Cancer Research* **6**, R437-R449 (2004).
22. Lesueur,F. *et al.* Allelic association of the human homologue of the mouse modifier Ptpmj with breast cancer. *Human Molecular Genetics* **14**, 2349-2356 (2005).
23. Lee,K.M. *et al.* Genetic polymorphisms of ataxia telangiectasia mutated and breast cancer risk. *Cancer Epidemiology Biomarkers & Prevention* **14**, 821-825 (2005).
24. MacPherson,G. *et al.* Association of a common variant of the CASP8 gene with reduced risk of breast cancer. *Journal of the National Cancer Institute* **96**, 1866-1869 (2004).
25. Rafii,S. *et al.* A potential role for the XRCC2 R188H polymorphic site in DNA-damage repair and breast cancer. *Human Molecular Genetics* **11**, 1433-1438 (2002).
26. Milne,R.L. *et al.* ERCC4 associated with breast cancer risk: A two-stage case-control study using high-throughput genotyping. *Cancer Research* **66**, 9420-9427 (2006).
27. Sigurdson,A.J. *et al.* Kin-cohort estimates for familial breast cancer risk in relation to variants in DNA base excision repair, BRCA1 interacting and growth factor genes. *Bmc Cancer* **4**, (2004).
28. Sigurdson,A.J. *et al.* Cancer incidence in the US radiologic technologists health study, 1983-1998. *Cancer* **97**, 3080-3089 (2003).
29. Frazer,K.A., Pachter,L., Poliakov,A., Rubin,E.M. & Dubchak,I. VISTA: computational tools for comparative genomics. *Nucleic Acids Research* **32**, W273-W279 (2004).

30. Mayor, C. *et al.* VISTA: visualizing global DNA sequence alignments of arbitrary length. *Bioinformatics* **16**, 1046-1047 (2000).
31. Kent, W.J. BLAT - The BLAST-like alignment tool. *Genome Research* **12**, 656-664 (2002).
